# Supplementary material
Source: HighWire-hosted journal article supplement (https://bmjopen.bmj.com/content/9/4/e027112)
Supplement: inline-supplementary-material-1 [file inline-supplementary-material-1.pdf]

|                                  |
|----------------------------------|
| <b>SUPPLEMENTARY INFORMATION</b> |
|----------------------------------|

**Title:** Impact of Persistent Anemia on Mortality in Patients Hospitalized with Acute  
Pulmonary Embolism: a Retrospective Observational Study

**Short running title:** Persistent Anemia in Pulmonary Embolism

**First author:** Wallace W.K. Chow <sup>a</sup>

**Second author:** Christopher C.Y. Wong <sup>a</sup>

**Third author:** Jerrett K. Lau <sup>a</sup>

**Fourth author:** Vincent Chow <sup>a</sup>

**Fifth author:** Leonard Kritharides <sup>a</sup>

**Sixth author:** Austin C.C. Ng <sup>a</sup>

(Correspondence) Cardiology Department, Concord Hospital, The University of Sydney

Hospital Road, Concord 2139 NSW Australia

Phone: (612) 9767 6296 Fax: (612) 9767 6994

Email: [chin.ng@sydney.edu.au](mailto:chin.ng@sydney.edu.au)

<sup>a</sup> Department of Cardiology, Concord Hospital, The University of Sydney, Australia

**Figure S1: Adjusted survival curve analysis between excluded versus study patients**

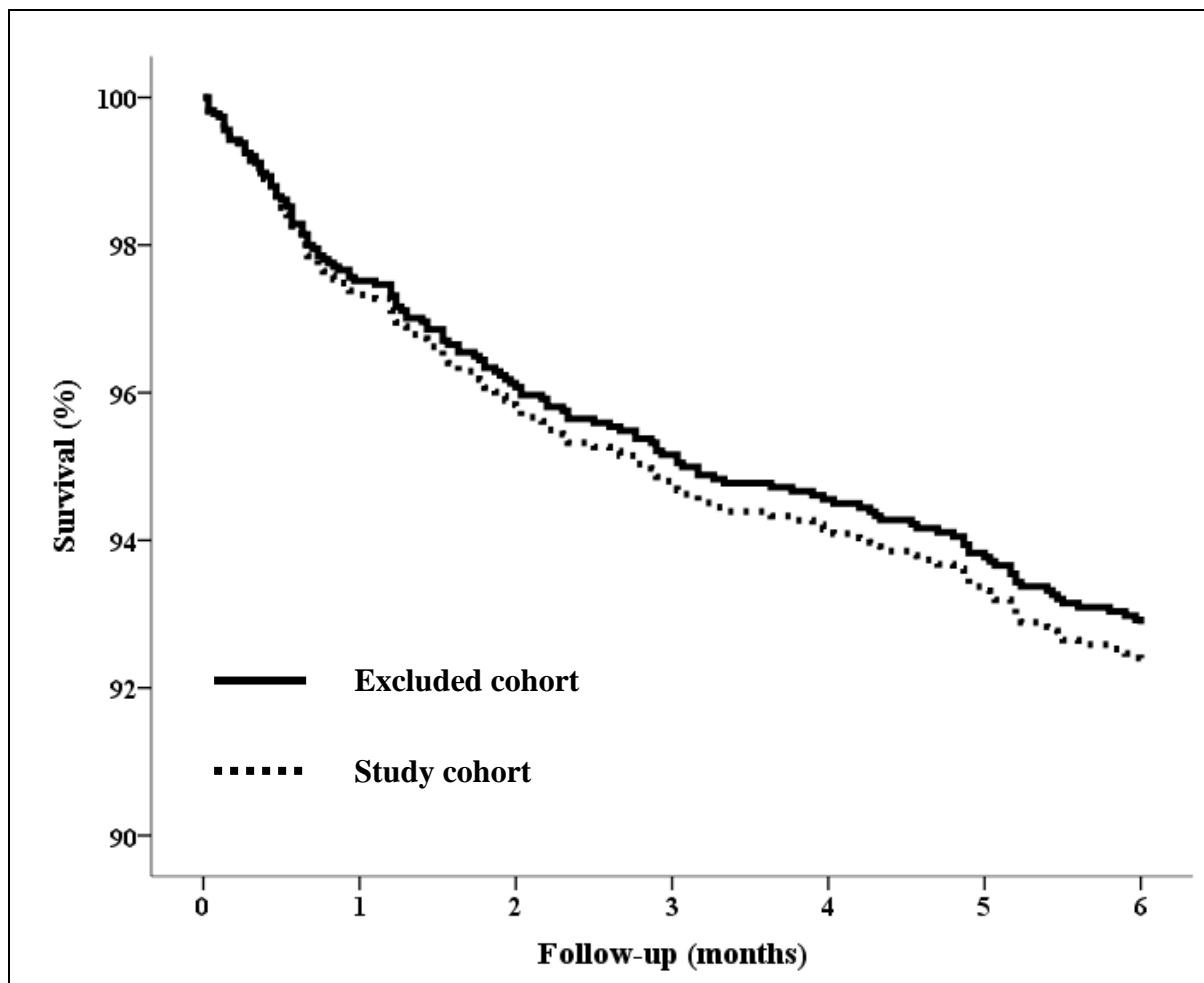

**Legend**

The adjusted survival analysis factored in differences in baseline characteristics (see Supplementary Table 1). In addition to sex, it included the following variables with  $p < 0.10$ : computed-tomography pulmonary angiogram as imaging modality for diagnosis, concomitant deep vein thrombosis, ischemic heart disease, atrial fibrillation/flutter, neurodegenerative disease, simplified pulmonary embolism severity index (sPESI), day-1 sodium, INR (international normalized ratio), hemoglobin, and estimated glomerular filtration rate, and blood transfusion during admission. The unbroken line represents excluded cohort while the broken line represents the study cohort; there was no difference in survival ( $p=0.78$ ).

**Table S1: Baseline characteristics: Included versus Excluded Patients**

| <b>Parameters</b>                            | <b>Study cohort<br/>(N=1099) *</b> | <b>Excluded cohort<br/>(N=327) *</b> | <b>p value</b> |
|----------------------------------------------|------------------------------------|--------------------------------------|----------------|
| Age, years                                   | 73 (60-81)                         | 65 (52-75)                           | <0.001         |
| Males                                        | 503 (46)                           | 126 (39)                             | 0.02           |
| Concomitant DVT                              | 239 (22)                           | 45 (14)                              | 0.001          |
| Length of stay, days                         | 7.0 (5-11)                         | 3.0 (2-6)                            | <0.001         |
| <b>Imaging modality</b>                      |                                    |                                      |                |
| Ventilation-perfusion scintigraphy           | 818 (74)                           | 257 (79)                             | 0.14           |
| CTPA                                         | 396 (36)                           | 98 (30)                              | 0.047          |
| Both imaging modalities used                 | 115 (10)                           | 33 (10)                              | 0.92           |
| <b>Comorbidities</b> <sup>†</sup>            |                                    |                                      |                |
| Ischemic heart disease                       | 201 (18)                           | 35 (11)                              | 0.001          |
| Stroke                                       | 35 (3)                             | 5 (2)                                | 0.13           |
| Heart failure                                | 144 (13)                           | 15 (5)                               | <0.001         |
| Atrial fibrillation/flutter                  | 174 (16)                           | 23 (7)                               | <0.001         |
| Valvular heart disease                       | 25 (2)                             | 9 (3)                                | 0.68           |
| <b>Cardiac risk factors</b>                  |                                    |                                      |                |
| Hypertension                                 | 282 (26)                           | 72 (22)                              | 0.19           |
| Hyperlipidemia                               | 113 (10)                           | 39 (12)                              | 0.41           |
| Diabetes                                     | 154 (14)                           | 37 (11)                              | 0.23           |
| Current smoker                               | 91 (8)                             | 26 (8)                               | 0.91           |
| Ex-smoker                                    | 191 (17)                           | 55 (17)                              | 0.87           |
| <b>Non-cardiac comorbidities</b>             |                                    |                                      |                |
| Malignancy                                   | 250 (23)                           | 51 (16)                              | 0.005          |
| Chronic pulmonary disease                    | 140 (13)                           | 34 (10)                              | 0.29           |
| Neurodegenerative disease                    | 73 (7)                             | 9 (3)                                | 0.007          |
| Chronic renal disease                        | 69 (6)                             | 10 (3)                               | 0.03           |
| <b>Hemodynamic profile at admission</b>      |                                    |                                      |                |
| Heart rate, beats/minute                     | 87 (74-102)                        | 82 (71-94)                           | <0.001         |
| Heart rate >110 beats/minute                 | 149 (15)                           | 23 (8)                               | 0.001          |
| Systolic BP, mm Hg                           | 140 (122-157)                      | 138 (123-152)                        | 0.30           |
| Systolic BP <100mmHg                         | 35 (3)                             | 9 (3)                                | 0.86           |
| Oxyhemoglobin saturation, %                  | 96 (94-98)                         | 97 (95-98)                           | 0.006          |
| sPESI score                                  | 1.0 (0.0-2.0)                      | 0.0 (0.0-1.0)                        | <0.001         |
| sPESI >0                                     | 706 (64)                           | 132 (40)                             | <0.001         |
| Shock index >0.7 <sup>‡</sup>                | 349 (35)                           | 72 (24)                              | <0.001         |
| <b>Blood profile during admission</b>        |                                    |                                      |                |
| Day-1 sodium, mmol/L                         | 139 (137-141)                      | 139 (137-141)                        | 0.02           |
| Day-1 eGFR, ml/min/1.73m <sup>2</sup>        | 75 (56-94)                         | 81 (66-96)                           | <0.001         |
| Day-1 INR                                    | 1.1 (1.0-1.2)                      | 1.0 (1.0-1.1)                        | <0.001         |
| Day-1 hemoglobin, g/L                        | 130 (116-142)                      | 136 (124-145)                        | <0.001         |
| Blood transfusion during admission           | 71 (6)                             | 4 (1)                                | <0.001         |
| Blood transfusion (during Day 1-7)           | 60 (5)                             | 4 (1)                                | 0.001          |
| <b>Admission medication use</b> <sup>§</sup> |                                    |                                      |                |
| Aspirin                                      | 239 (24)                           | 64 (21)                              | 0.35           |
| Clopidogrel                                  | 53 (5)                             | 11 (4)                               | 0.29           |
| Thrombolysis                                 | 5 (0)                              | 1 (0)                                | 1.00           |

|            |        |         |      |
|------------|--------|---------|------|
| Warfarin   | 86 (9) | 33 (11) | 0.25 |
| Enoxaparin | 33 (3) | 7 (2)   | 0.45 |
| DOACs      | 0 (0)  | 1 (0)   | 0.23 |

Continuous variables expressed as median with interquartile range in brackets; all other categorical variables represent numbers of patients with values in brackets representing percentages.

BP, blood pressure, CTPA, computed tomography pulmonary angiography; DOACs, direct-acting oral anticoagulants including dabigatran, rivaroxaban, and apixaban; DVT, deep vein thrombosis;  $eGFR = 186 \times ([S_{CR}/88.4]^{-1.154}) \times (age)^{-0.203} \times (0.742 \text{ if female})$ , where  $eGFR$  = estimated glomerular filtration rate (ml/min/1.73m<sup>2</sup>),  $S_{CR}$  = serum creatinine concentration (μmol/L), and age is expressed in years; INR, international normalized ratio; sPESI = simplified Pulmonary Embolism Severity Index (sPESI score incorporates age, history of malignancy, heart failure/chronic lung disease, heart rate  $\geq 110$  beats/minute, systolic BP  $< 100$  mmHg and oxyhemoglobin saturation  $< 90\%$ ).

\* The included study cohort incorporated all patients who had hemoglobin assessments on more than one day during admission. Excluded cohort were patients who had none or only one hemoglobin assessment during admission.

† Neurodegenerative disease includes dementia and Parkinson's disease.

‡ Shock index = heart rate divided by systolic BP (index  $> 0.7$  signify hemodynamic compromise).

§ Number of patients with missing data: Aspirin (Included cohort = 96; Excluded cohort = 24); Clopidogrel (Included cohort = 96; Excluded cohort = 24); Thrombolysis (Included cohort = 98; Excluded cohort = 25); Warfarin (Included cohort = 97; Excluded cohort = 24); Enoxaparin (Included cohort = 96; Excluded cohort = 24); DOACs (Included cohort = 96; Excluded cohort = 24).

**Table S2: Comparing all-cause mortality stratified by excluded versus study patients**

| <b>All-cause mortality, no. (%) *</b> | <b>Study cohort<br/>(N=1099) †</b> | <b>Excluded cohort<br/>(N=327) †</b> | <b>Unadjusted<br/>p value</b> | <b>Adjusted<br/>p value ‡</b> |
|---------------------------------------|------------------------------------|--------------------------------------|-------------------------------|-------------------------------|
| 6-month                               | 140 (12.7)                         | 29 (8.9)                             | 0.06                          | 0.78                          |

\* Cox proportional hazards regression was used to compare 6-month mortality.

† The study cohort included all patients who had hemoglobin assessments on more than one day during admission. The excluded cohort were patients who had none or only one hemoglobin assessment during admission.

‡ The adjusted survival analysis factored in differences in baseline characteristics (see Supplementary Table 1). In addition to sex, it included the following variables with  $p < 0.10$ : computed-tomography pulmonary angiogram as imaging modality for diagnosis, concomitant deep vein thrombosis, ischemic heart disease, atrial fibrillation/flutter, neurodegenerative disease, simplified Pulmonary Embolism Severity Index (sPESI), day-1 sodium, INR (international normalized ratio), hemoglobin, and estimated glomerular filtration rate, and blood transfusion during admission.

**Table S3: All-cause mortality outcome**

| All-cause mortality | Study cohort | Normal          | Transient anemia | Acquired anemia | Persistent anemia |
|---------------------|--------------|-----------------|------------------|-----------------|-------------------|
| no. (%) *           | (N=1099)     | Group 1 (N=575) | Group 2 (N=64)   | Group 3 (N=124) | Group 4 (N=336)   |
| 6-month             | 140 (12.7)   | 38 (6.6)        | 8 (12.3)         | 17 (13.9) †     | 77 (22.9) †§      |

Group 1: Normal (patients without anemia on presentation and throughout admission); Group 2: Transient anemia (anemia on presentation, then normalized during admission); Group 3: Acquired anemia (normal hemoglobin levels on presentation, then declined to levels below normal during admission); Group 4: Persistent anemia (patients with persistent anemia at baseline and throughout admission).

\* Cox proportional hazards regression was used to compare 6-month mortality. Of the patients who died at the 6-month time-point, no patients who died received blood transfusion in Group 1 or Group 3, while 2 patients in Group 2, and 25 patients in Group 4 received blood transfusion during their index PE admission.

† p<0.05 compared to Group 1

‡ p<0.05 compared to Group 2

§ p<0.05 compared to Group 3

---

**Table S4: Univariable predictors for all-cause 6-month mortality**

| Univariable analysis | Clinical parameters *               | HR (95% CI)      | p value |
|----------------------|-------------------------------------|------------------|---------|
| 6-month death        | sPESI score ( $\geq 1$ )            | 8.90 (4.53-17.5) | <0.001  |
|                      | Male                                | 1.35 (0.97-1.88) | 0.08    |
|                      | Concomitant DVT                     | 1.06 (0.71-1.57) | 0.77    |
|                      | Ischemic heart disease              | 1.12 (0.74-1.70) | 0.59    |
|                      | Stroke                              | 2.06 (1.01-4.20) | 0.05    |
|                      | Heart failure                       | 1.52 (0.98-2.34) | 0.06    |
|                      | Atrial fibrillation/flutter         | 1.01 (0.64-1.58) | 0.98    |
|                      | Valvular disease                    | 1.63 (0.67-3.99) | 0.28    |
|                      | Hypertension                        | 0.58 (0.37-0.90) | 0.02    |
|                      | Hyperlipidemia                      | 0.37 (0.16-0.84) | 0.02    |
|                      | Diabetes                            | 0.89 (0.54-1.46) | 0.65    |
|                      | Current/ex-smoker                   | 1.07 (0.74-1.55) | 0.73    |
|                      | Malignancy                          | 7.01 (4.96-9.89) | <0.001  |
|                      | Chronic pulmonary disease           | 1.74 (1.15-2.65) | 0.01    |
|                      | Neurodegenerative disease           | 1.45 (0.82-2.56) | 0.20    |
|                      | Chronic renal disease               | 1.04 (0.53-2.05) | 0.90    |
|                      | Day-1 sodium ( $\leq 138.5$ mmol/L) | 2.42 (1.72-3.42) | <0.001  |
|                      | Day-1 INR ( $\geq 1.2$ )            | 2.65 (1.86-3.78) | <0.001  |
|                      | Blood transfusion during admission  | 4.09 (2.69-6.23) | <0.001  |
|                      | Thrombolysis                        | 0.05 (0.00-9791) | 0.63    |
|                      | Normal hemoglobin                   | 1.00 (reference) |         |
|                      | Transient anemia                    | 1.88 (0.88-4.03) | 0.10    |
|                      | Acquired anemia                     | 2.20 (1.24-3.89) | 0.007   |
|                      | Persistent anemia                   | 3.80 (2.58-5.61) | <0.001  |

BP, blood pressure; CI, confidence interval; DVT, deep vein thrombosis; HR, hazards ratio; INR, international normalized ratio; sPESI, simplified Pulmonary Embolism Severity Index (sPESI score incorporates age, history of malignancy, heart failure/chronic lung disease, heart rate  $\geq 110$  beats/minute, systolic BP  $< 100$  mmHg and oxyhemoglobin saturation  $< 90\%$ ).

**Table S5: Univariable predictors for all-cause 6-month mortality (non-transfused cohort, N=1028)**

| Univariable analysis | Clinical parameters *               | HR (95% CI)      | p value |
|----------------------|-------------------------------------|------------------|---------|
| 6-month death        | sPESI score ( $\geq 1$ )            | 7.53 (3.81-14.9) | <0.001  |
|                      | Male                                | 1.34 (0.93-1.94) | 0.12    |
|                      | Concomitant DVT                     | 1.06 (0.68-1.65) | 0.81    |
|                      | Ischemic heart disease              | 1.22 (0.78-1.92) | 0.39    |
|                      | Stroke                              | 2.21 (1.03-4.74) | 0.04    |
|                      | Heart failure                       | 1.98 (1.26-3.10) | 0.003   |
|                      | Atrial fibrillation/flutter         | 1.25 (0.78-2.02) | 0.35    |
|                      | Valvular disease                    | 2.02 (0.82-4.95) | 0.13    |
|                      | Hypertension                        | 0.68 (0.43-1.08) | 0.10    |
|                      | Hyperlipidemia                      | 0.46 (0.20-1.05) | 0.07    |
|                      | Diabetes                            | 0.99 (0.58-1.68) | 0.97    |
|                      | Current/ex-smoker                   | 1.09 (0.72-1.65) | 0.69    |
|                      | Malignancy                          | 6.07 (4.18-8.82) | <0.001  |
|                      | Chronic pulmonary disease           | 1.69 (1.05-2.72) | 0.03    |
|                      | Neurodegenerative disease           | 1.71 (0.94-3.11) | 0.08    |
|                      | Chronic renal disease               | 1.13 (0.53-2.44) | 0.75    |
|                      | Day-1 sodium ( $\leq 138.5$ mmol/L) | 2.62 (1.78-3.85) | <0.001  |
|                      | Day-1 INR ( $\geq 1.2$ )            | 2.35 (1.58-3.48) | <0.001  |
|                      | Thrombolysis                        | 0.05 (0-1133581) | 0.73    |
|                      | Normal hemoglobin                   | 1.00 (reference) |         |
|                      | Transient anemia                    | 1.53 (0.65-3.61) | 0.34    |
|                      | Acquired anemia                     | 2.26 (1.28-4.00) | 0.005   |
|                      | Persistent anemia                   | 3.08 (2.02-4.67) | <0.001  |

BP, blood pressure; CI, confidence interval; DVT, deep vein thrombosis; HR, hazards ratio; INR, international normalized ratio; sPESI, simplified Pulmonary Embolism Severity Index (sPESI score incorporates age, history of malignancy, heart failure/chronic lung disease, heart rate  $\geq 110$  beats/minute, systolic BP  $< 100$  mmHg and oxyhemoglobin saturation  $< 90\%$ ).
